# Supplementary material for: Photofabrication of fluorescent nanospheres from de novo designed peptides, and their enzyme-responsive dissociation in living cells
Source: Royal Society of Chemistry journal article supplement (doi:10.1039/d4ma00024b), 2024-01-01
Supplement: d4ma00024b1.pdf [file d4ma00024b1.pdf]

## Supporting Information

### **Photofabrication of fluorescent nanospheres from *de novo* designed peptides, and their enzyme-responsive dissociation in living cells**

*Sijie He,<sup>a</sup> Xiang Shu,<sup>a</sup> Zhaoyang Wang,<sup>a</sup> Xue-Wang Gao,<sup>b</sup> Ke Feng,<sup>b</sup> Sumin Yang,<sup>a</sup> Jianqun Shao<sup>a</sup> and Nan Xie<sup>\*a</sup>*

*<sup>a</sup> School of Pharmaceutical Sciences, Capital Medical University, Beijing 100069, P. R. China.  
E-mail: nanxie@ccmu.edu.cn*

*<sup>b</sup> Key Laboratory of Photochemical Conversion and Optoelectronic Materials, Technical Institute of Physics and Chemistry, the Chinese Academy of Sciences, Beijing 100190, P. R. China.*

**Characterization.** Transmission electron microscope (TEM) images were conducted by JEM-2100F microscope at accelerating voltage of 160 kV. High-resolution electrospray ionization mass spectrometries (HR-ESI MS) were performed on a ThermoScientific Q Exactive UHMR Hybrid Quadrupole-Orbitrap Mass Spectrometer. <sup>1</sup>H nuclear magnetic resonance (NMR) spectra were recorded on a Bruker Ascend 600 MHz spectrometer. Fourier transform infrared (FT-IR) spectra were recorded on a Thermo Scientific Nicolet iS5 system. UV-visible (UV-vis) absorption spectra were recorded on a Shimadzu UV-2600 spectrophotometer. Fluorescence measurements were run on a Hitachi F-2500 fluorescence spectrophotometer. Circular dichroism (CD) spectra were measured on a Jasco J-810 spectrometer using 1-mm quartz cuvette. Dynamic light scattering (DLS) and zeta potential ( $\zeta$ ) were determined by a Malvern Nano-ZS90 Zetasizer.

**Table S1.** Loading content (%) and encapsulation efficiency (%) of PNS for fluorescent dyes.

| Sample <sup>a</sup> | Loading content (%) | Encapsulation efficiency (%) |
|---------------------|---------------------|------------------------------|
| <b>RhB@YXD-PNS</b>  | 17.1                | 73.8                         |
| <b>DPA@YX-PNS</b>   | 12.8                | 70.8                         |
| <b>FL@YXR-PNS</b>   | 14.0                | 72.6                         |

<sup>a</sup>The feeding ratio of dye to peptide in weight was 0.2:1. The loading content and encapsulation efficiency were calculated by the following formulas: loading content = (weight of loaded dye/weight of dye-loaded PNS) × 100%, encapsulation efficiency = (weight of loaded dye/weight of feeding dye) × 100%.

**Table S2.** Encapsulation efficiency (%) of PNS for different fluorescent dyes.

| Dye \ Peptide | YXD  | YX   | YXR  |
|---------------|------|------|------|
| <b>RhB</b>    | 73.8 | 70.9 | 68.2 |
| <b>DPA</b>    | 64.2 | 70.8 | 60.5 |
| <b>FL</b>     | 38.9 | 62.7 | 72.6 |

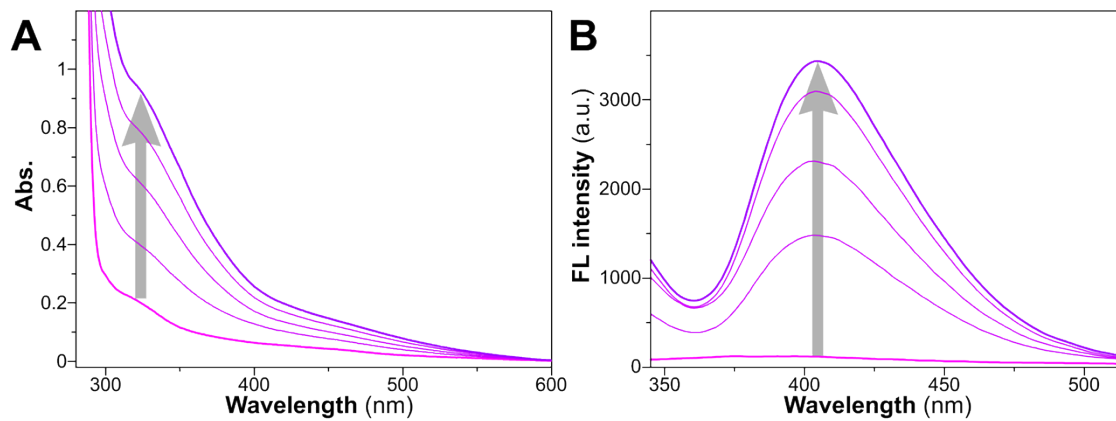

**Fig. S1** Time-dependent changes of UV-vis absorption and fluorescence emission spectra for YX peptide upon irradiation of 0, 2, 4, 6, 10 min.

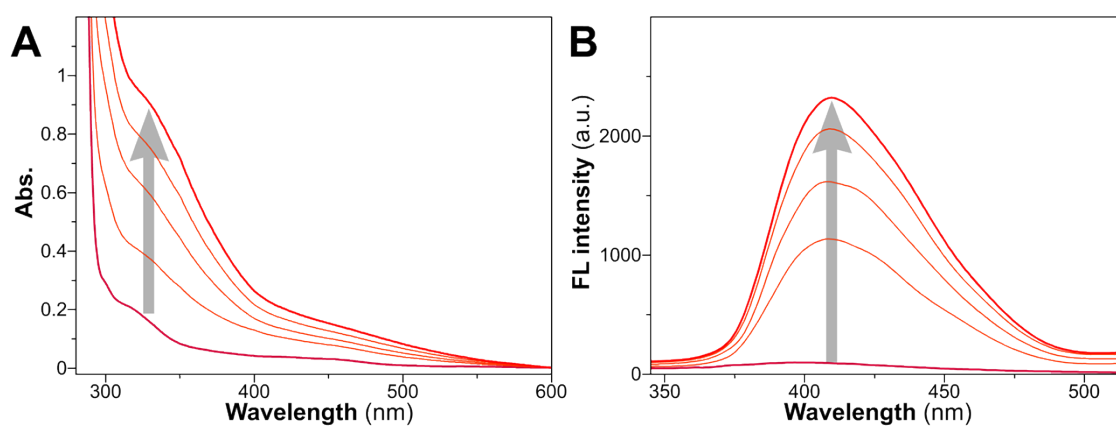

**Fig. S2** Time-dependent changes of UV-vis absorption and fluorescence emission spectra for YXR peptide upon irradiation of 0, 2, 4, 6, 10 min.

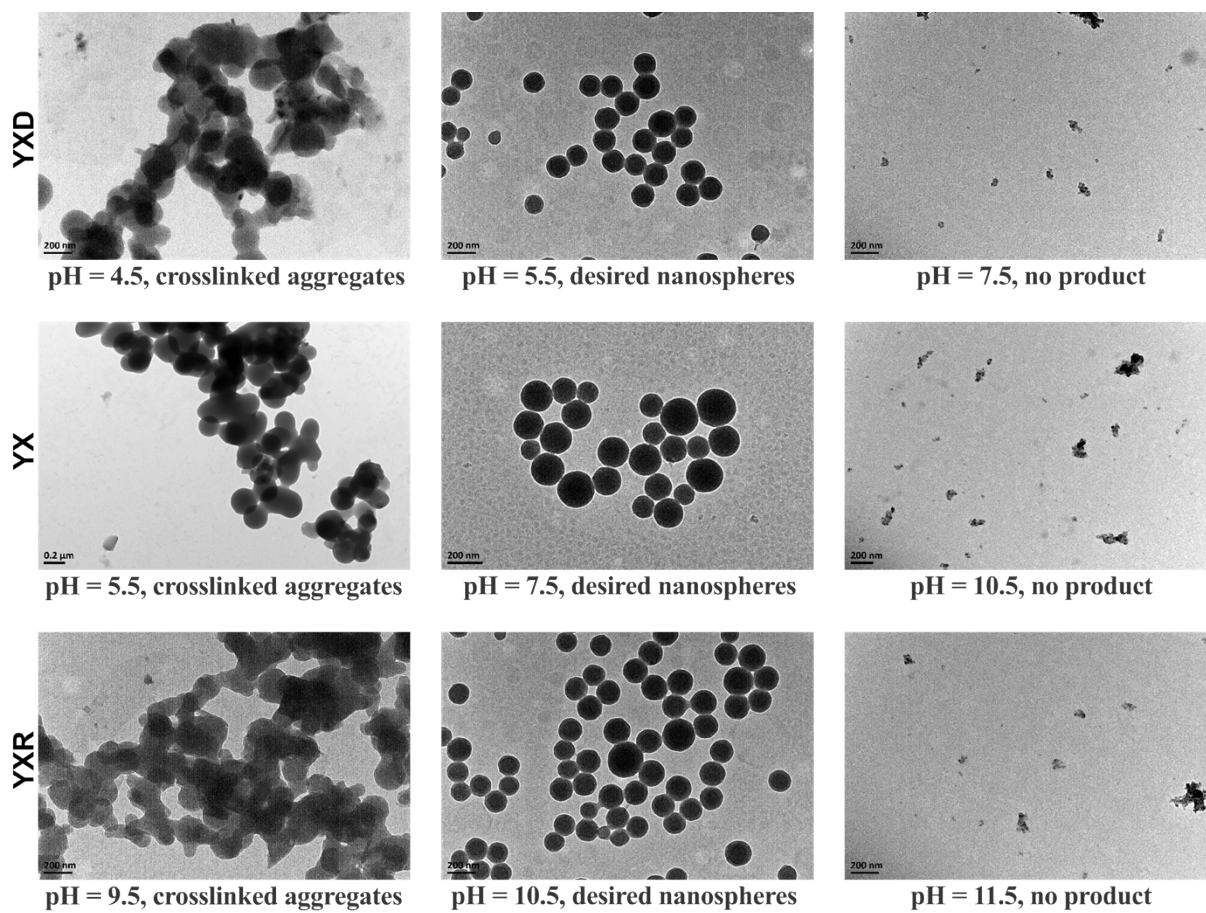

**Fig. S3** TEM images of the photocrosslinking products of MMP-responsive peptides at different pH conditions.

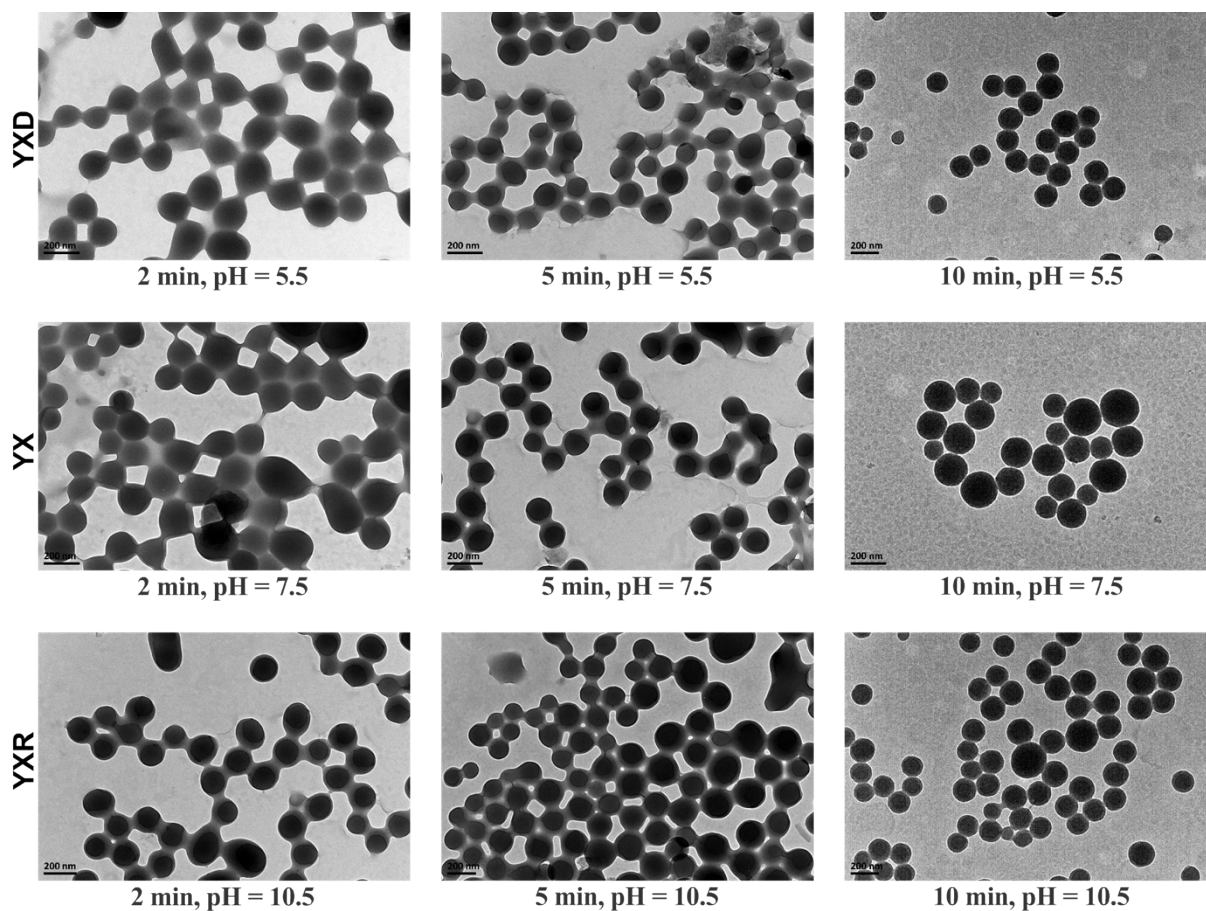

**Fig. S4** TEM image for MMP-responsive peptides after treated with light irradiation (405-nm LEDs, 112  $\text{mW cm}^{-2}$ ) for 2, 6, and 10 min, respectively.

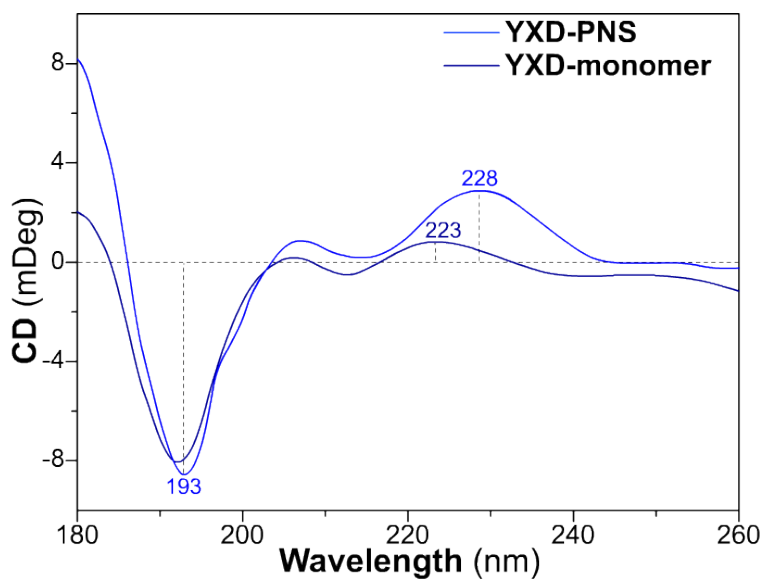

**Fig. S5** CD spectra of YXD peptide and YXD-PNS in PBS.

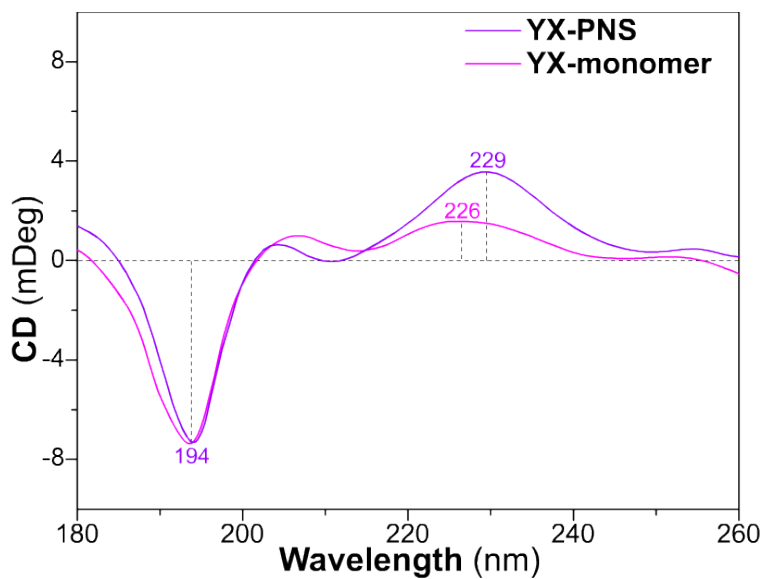

**Fig. S6** CD spectra of YX peptide and YX-PNS in PBS.

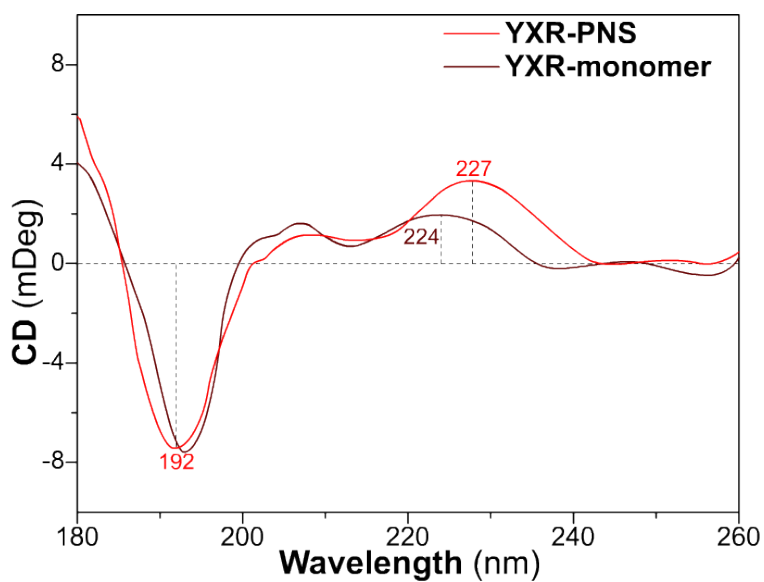

**Fig. S7** CD spectra of YXR peptide and YXR-PNS in PBS.

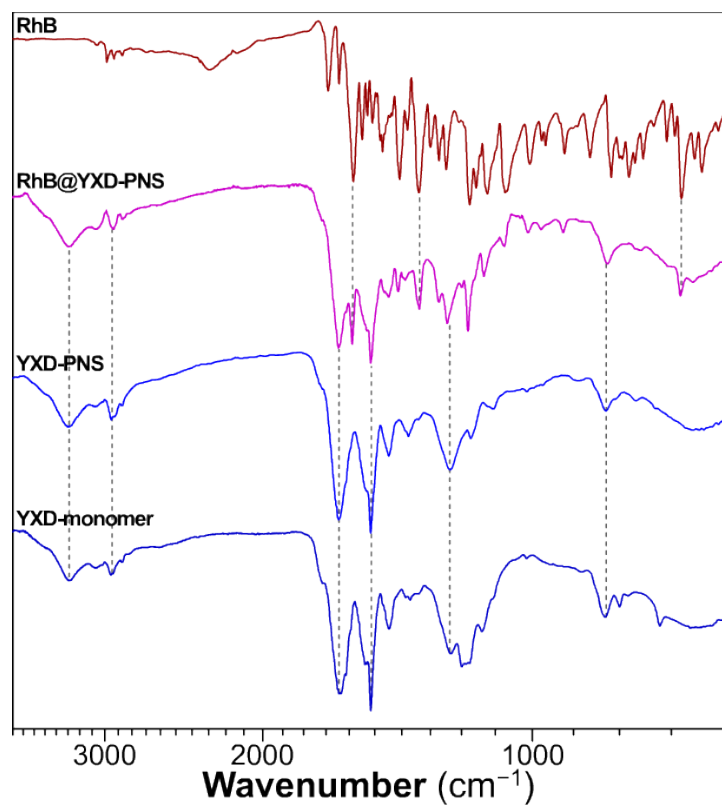

**Fig. S8** FT-IR spectra of RhB, RhB@YXD-PNS, YXD-PNS, YXD peptide.

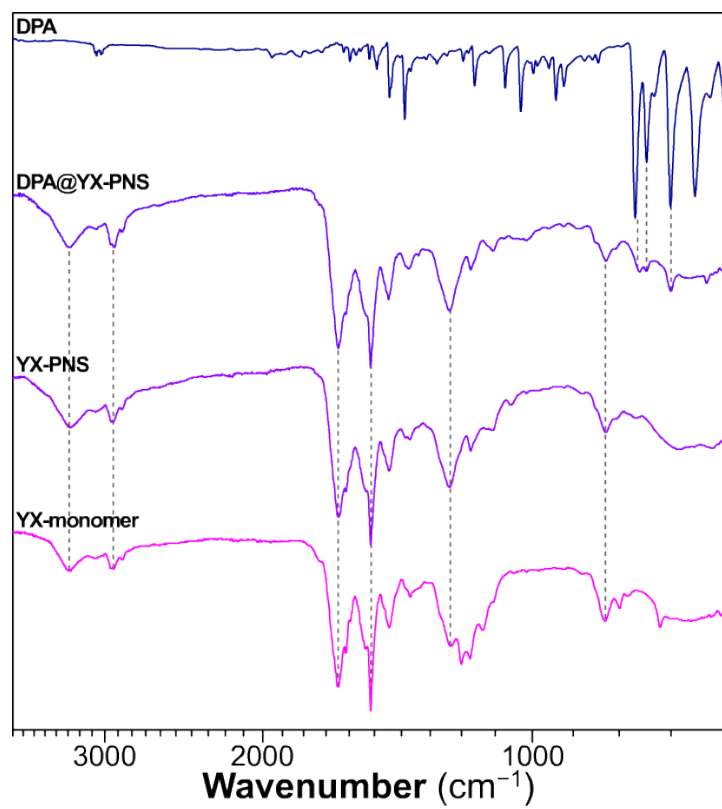

**Fig. S9** FT-IR spectra of DPA, DPA@YX-PNS, YX-PNS, YX peptide.

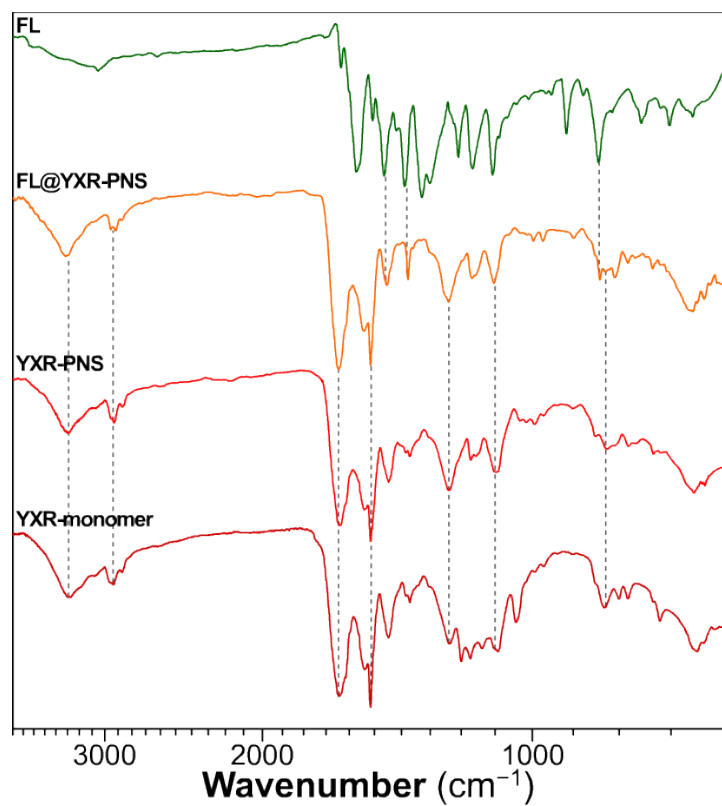

**Fig. S10** FT-IR spectra of FL, FL@YXR-PNS, YXR-PNS, YXR peptide.

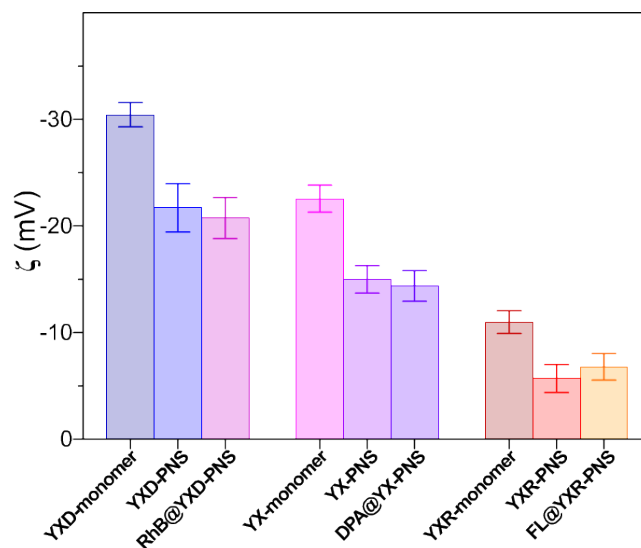

**Fig. S11** Zeta potentials of YXD peptide, YXD-PNS, RhB@YXD-PNS, YX peptide, YX-PNS, DPA@YX-PNS, YXR peptide, YXR-PNS, FL@YXR-PNS.



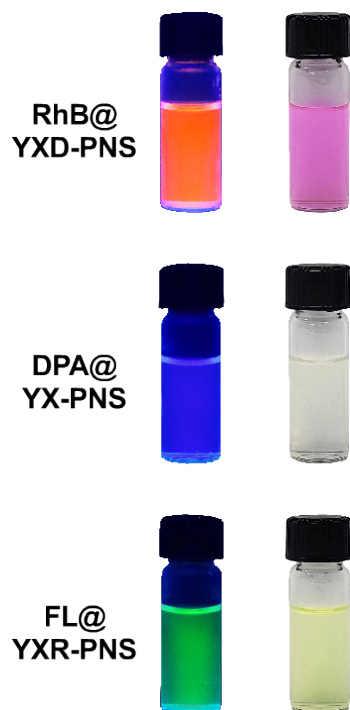

**Fig. S12** Photographs of RhB@YXD-PNS, DPA@YX-PNS, and FL@YXR-PNS solution of water under daylight (right) and a 365 nm UV lamp (left).

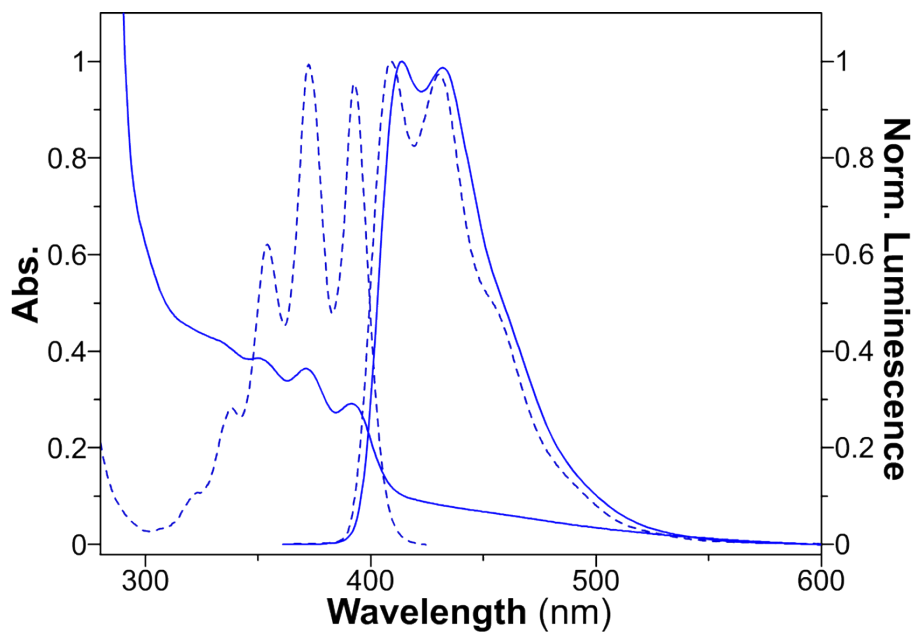

**Fig. S13** UV-vis absorption and normalized fluorescence spectra of free DPA (dotted line) and DPA@YX-PNS (solid line).

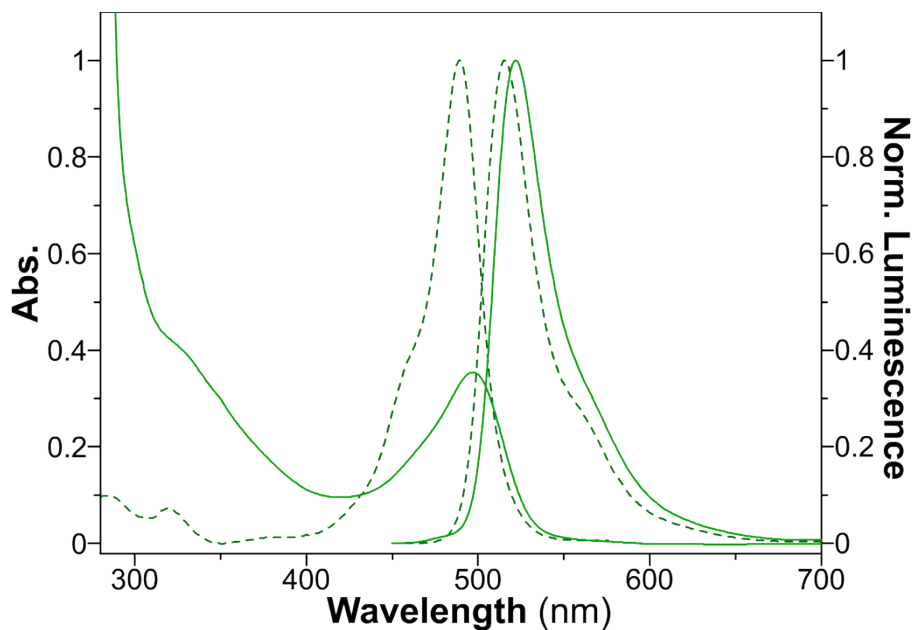

**Fig. S14** UV-vis absorption and normalized fluorescence spectra of free FL (dotted line) and FL@YXR-PNS (solid line).

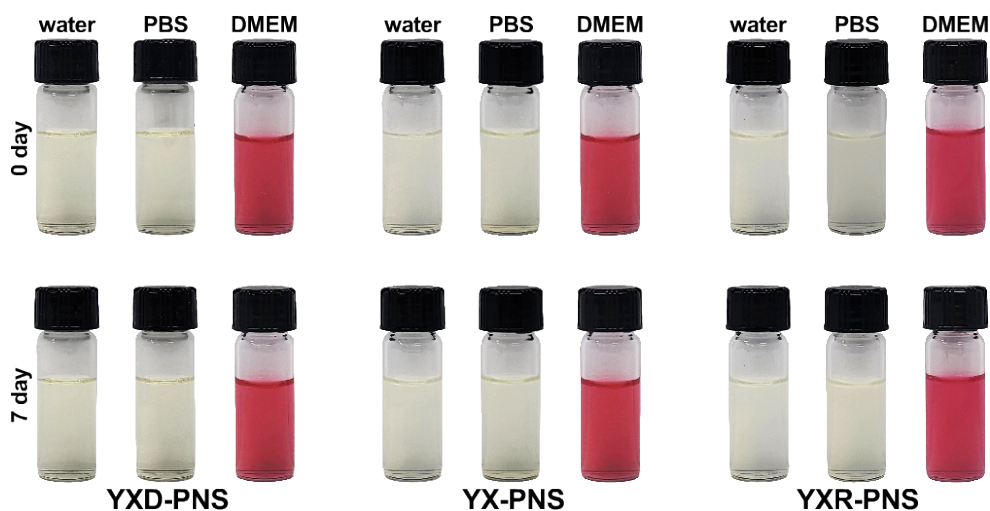

**Fig. S15** Photographs of YXD-PNS, YX-PNS, and YXR-PNS solution of water, PBS, and DMEM after placing at room temperature for 0 and 7 days.

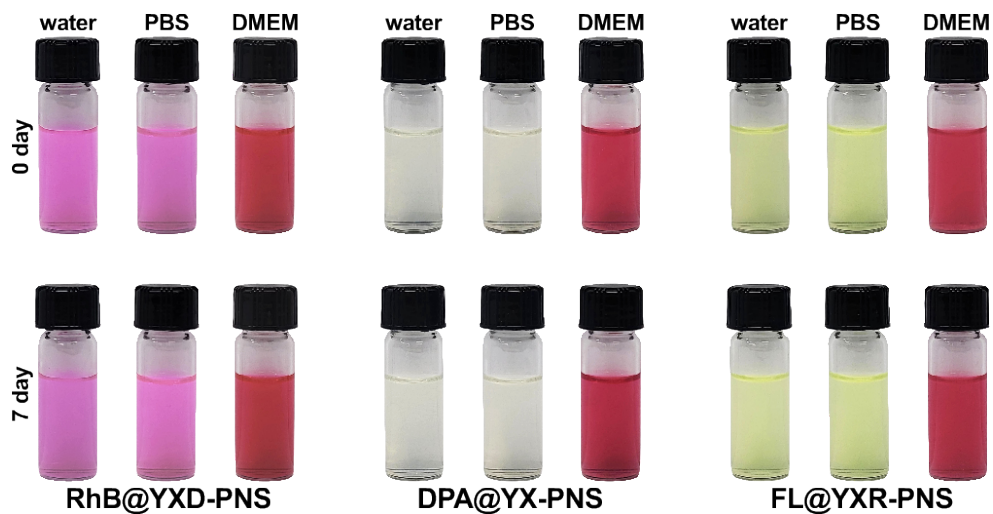

**Fig. S16** Photographs of RhB@YXD-PNS, DPA@YX-PNS, and FL@YXR-PNS solution of water, PBS, and DMEM after placing at room temperature for 0 and 7 days.

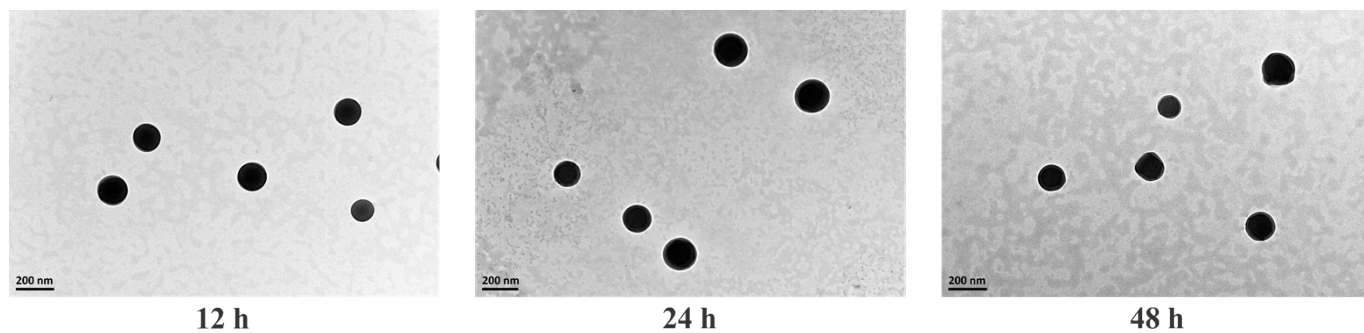

**Fig. S17** TEM images of YYXALGLPXYY PNS incubated with MMP at 37 °C for 12, 24, and 48 h, respectively.

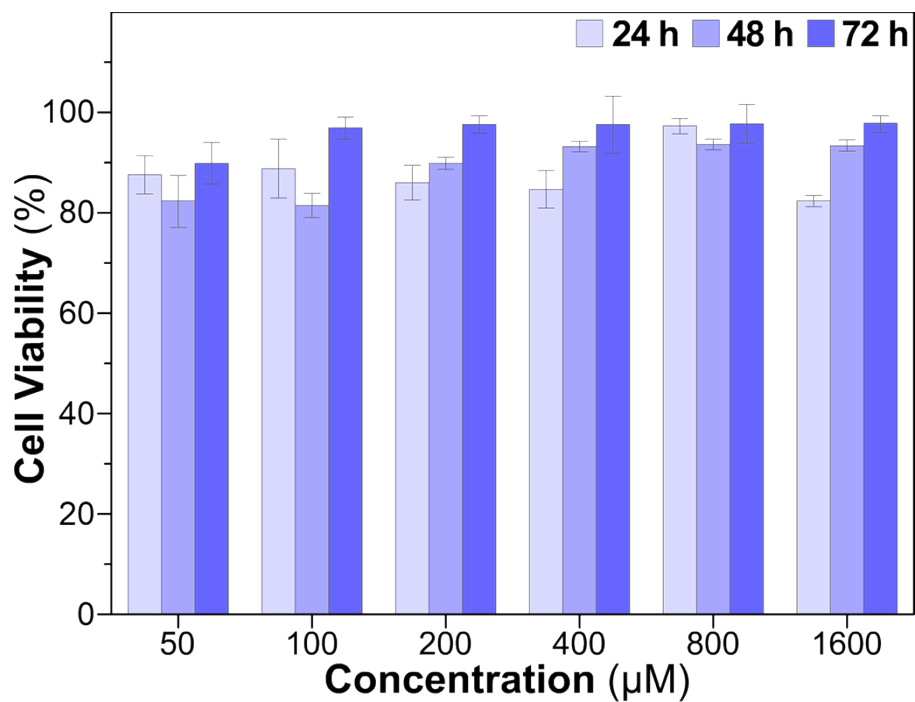

**Fig. S18** Cytotoxicity of RhB@YXD-PNS at various peptide concentrations in A549 cells after 24, 48, and 72 h incubation ( $n = 3$ ).

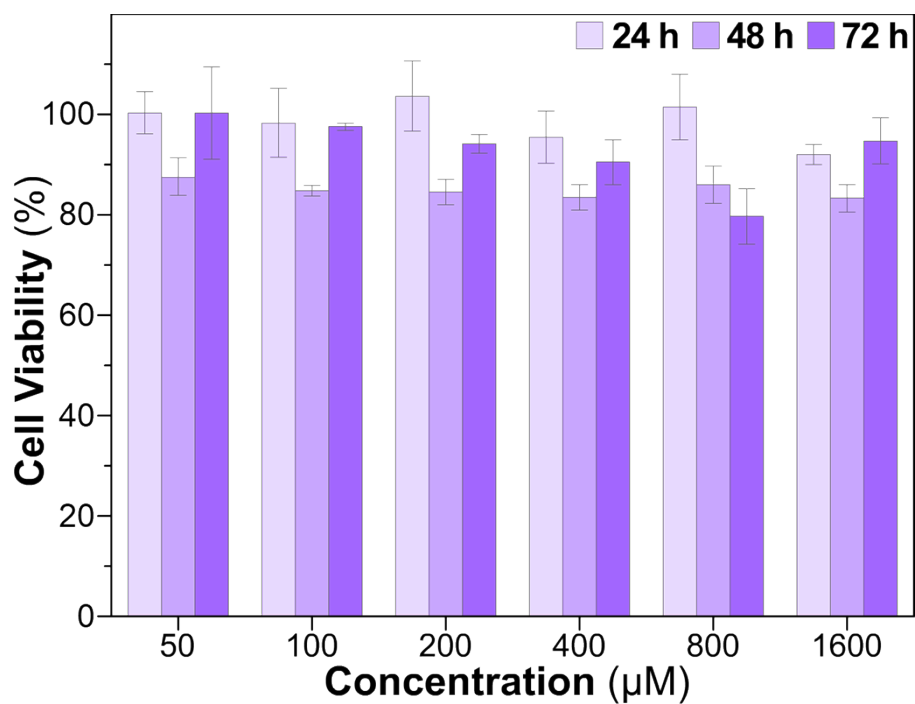

**Fig. S19** Cytotoxicity of DPA@YX-PNS at various peptide concentrations in A549 cells after 24, 48, and 72 h incubation ( $n = 3$ ).

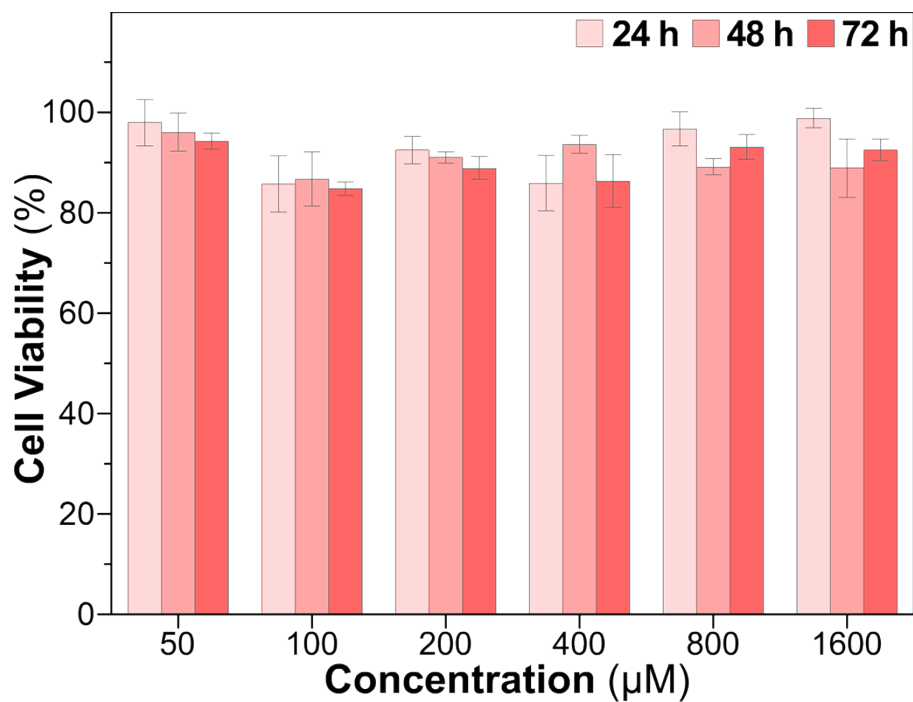

**Fig. S20** Cytotoxicity of FL@YXR-PNS at various peptide concentrations in A549 cells after 24, 48, and 72 h incubation ( $n = 3$ ).

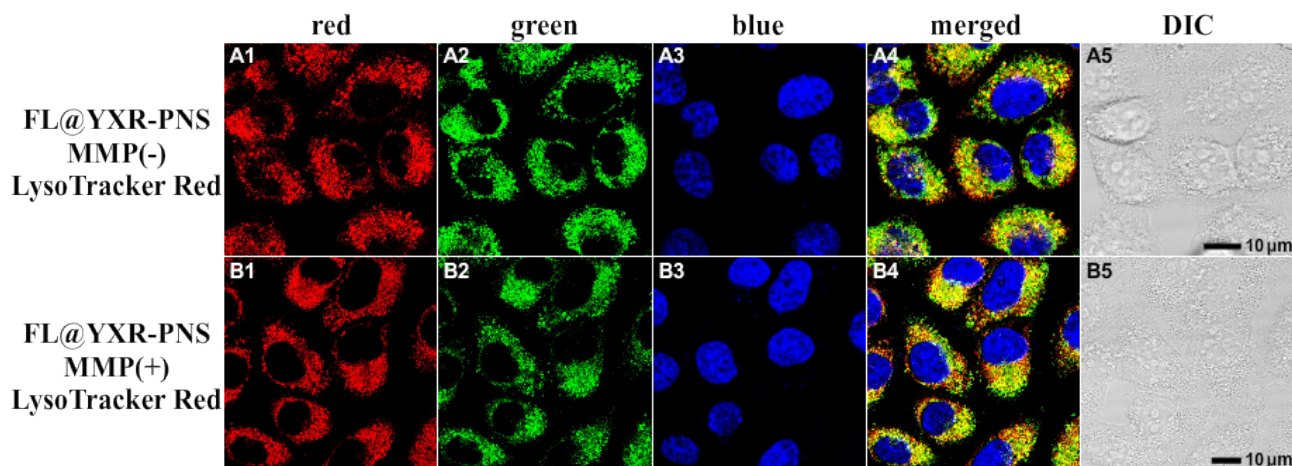

**Fig. S21** (A) Colocalization of FL@YXR-PNS with LysoTracker Green in A549 cells. (B) CLSM images for A549 cells incubated with FL@YXR-PNS upon stimuli of MMP. Cell were counterstained with Hoechst 33342 (blue) for nuclei.

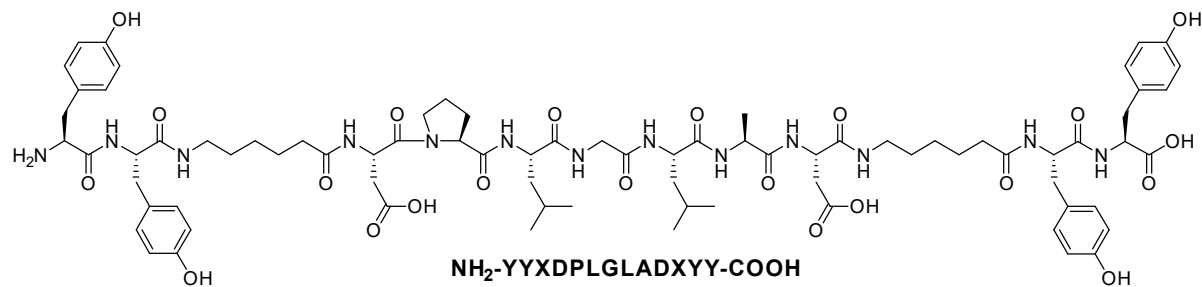

Fengke-#11 RT: 0.09 AV: 1 NL: 1.22E7  
 T: FTMS - p ESI Full ms [200.0000-3000.0000]

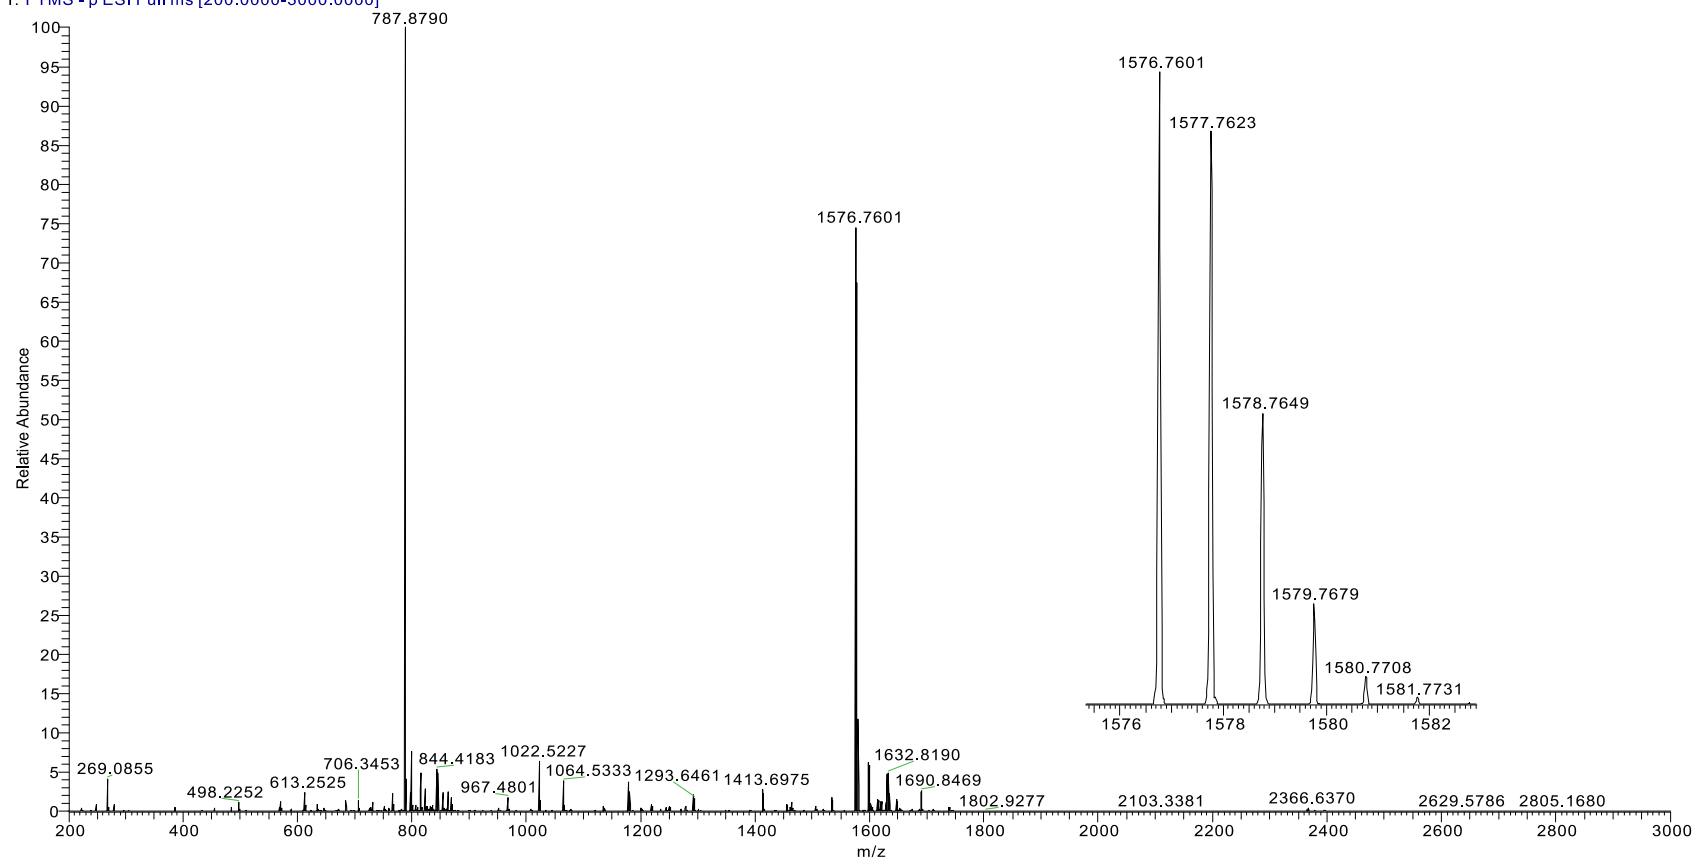

**Fig. S22** HR-ESI MS spectrum for YXD peptide.

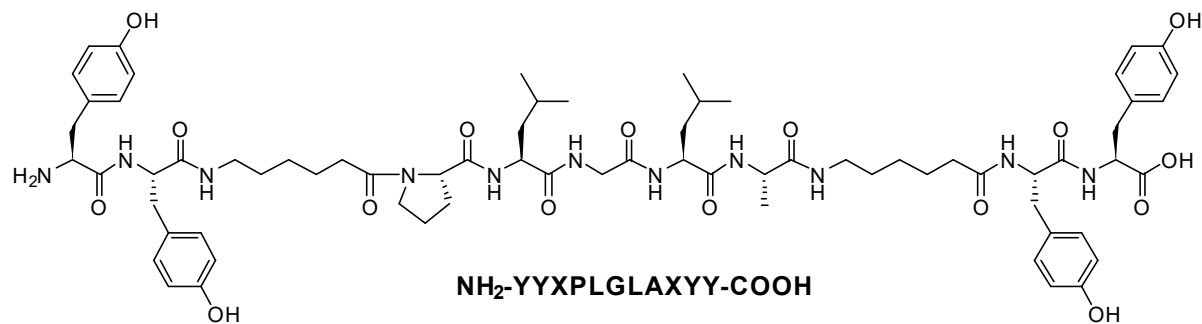

Fengke-7#39-41 RT: 0.21-0.22 AV: 3 SB: 3 0.05-0.06 NL: 8.54E5  
 T: FTMS + p ESI Full lock ms [150.0000-2250.0000]

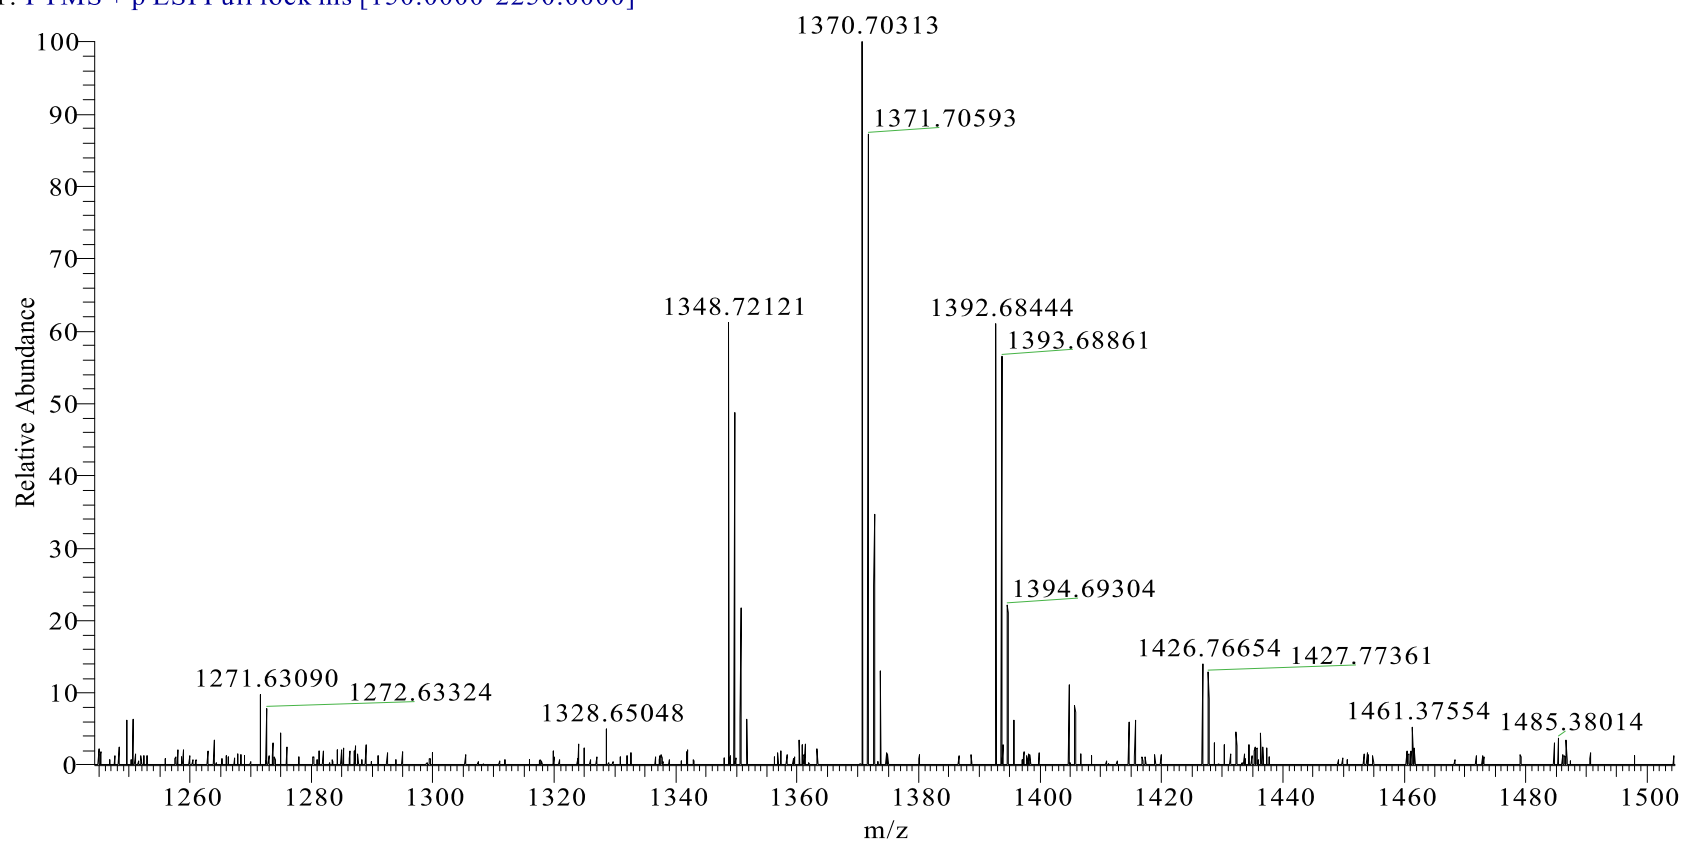

**Fig. S23** HR-ESI MS spectrum for YX peptide.

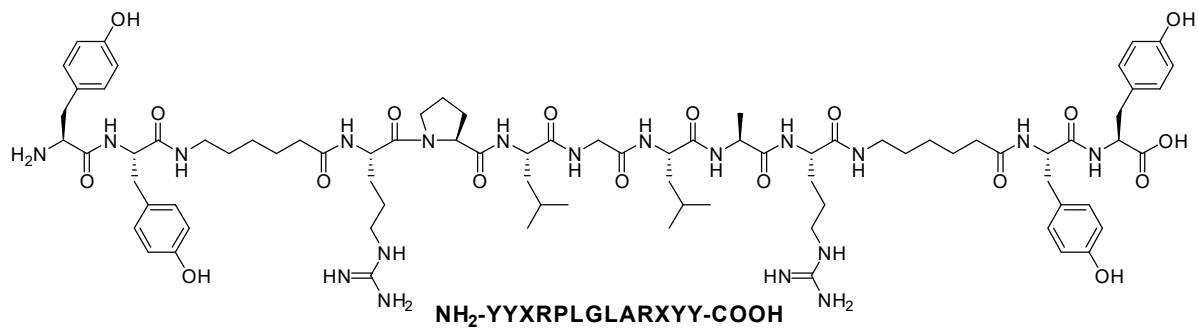

Fengke-#9 RT: 0.07 AV: 1 NL: 1.05E6  
 T: FTMS + p ESI Full lock ms [200.0000-3000.0000]

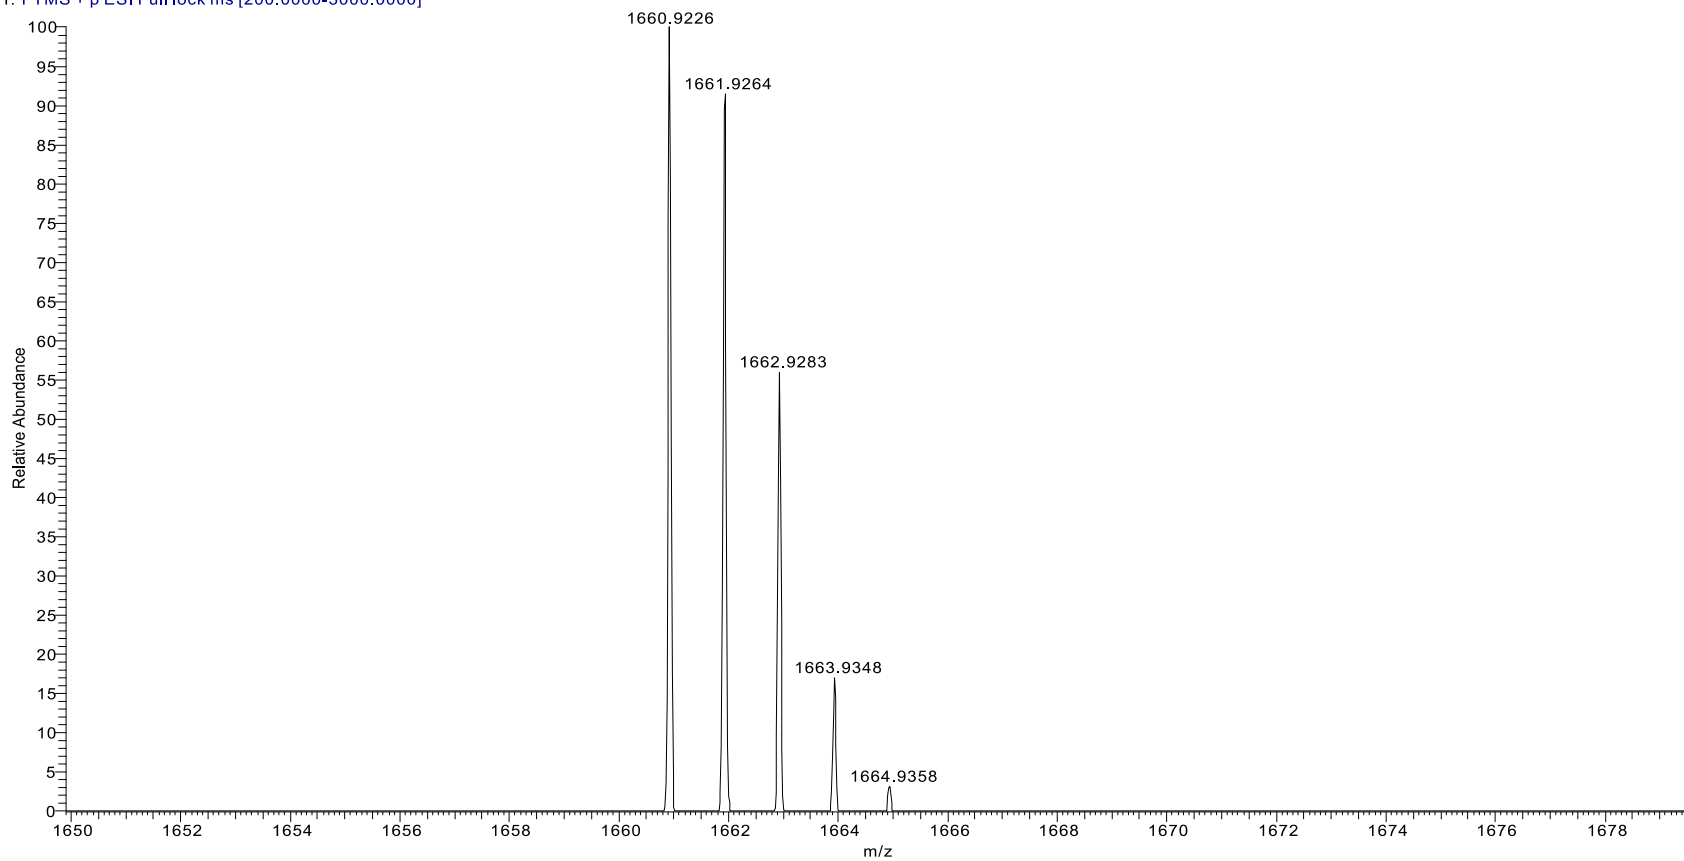

**Fig. S24** HR-ESI MS spectrum for YXR peptide.



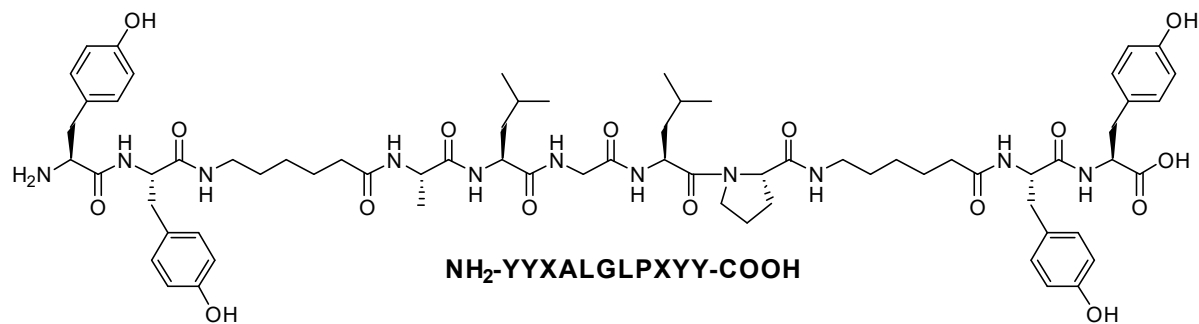

Fengke-201016085413 #17 RT: 0.10 AV: 1 NL: 4.84E5  
 T: FTMS + p ESI Full lock ms [150.0000-2250.0000]

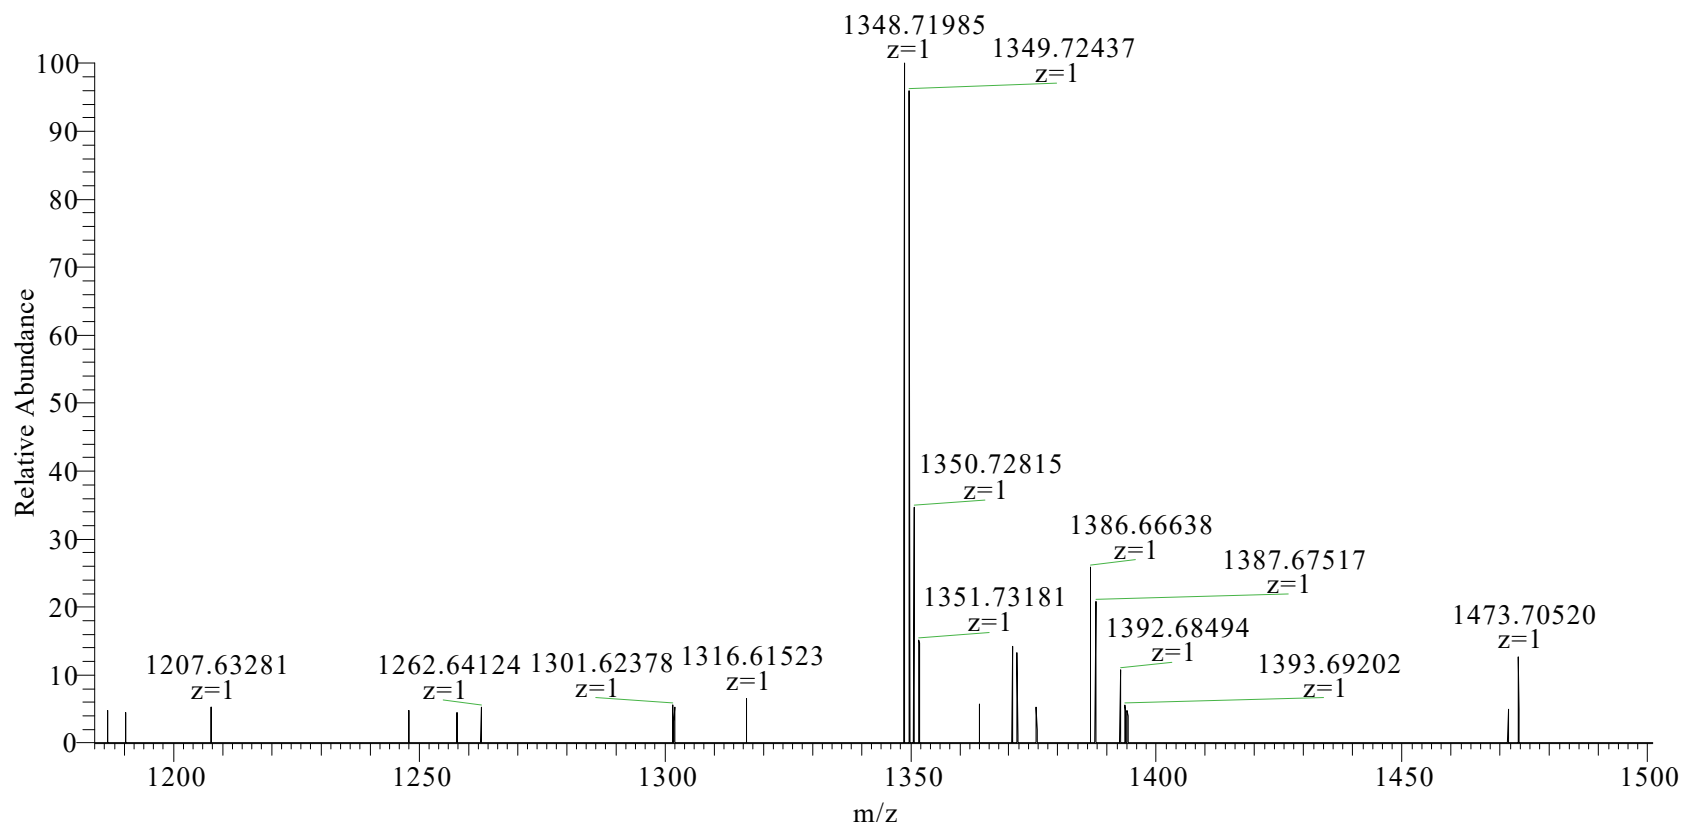

**Fig. S25** HR-ESI MS spectrum for YYXALGLPXYY peptide.

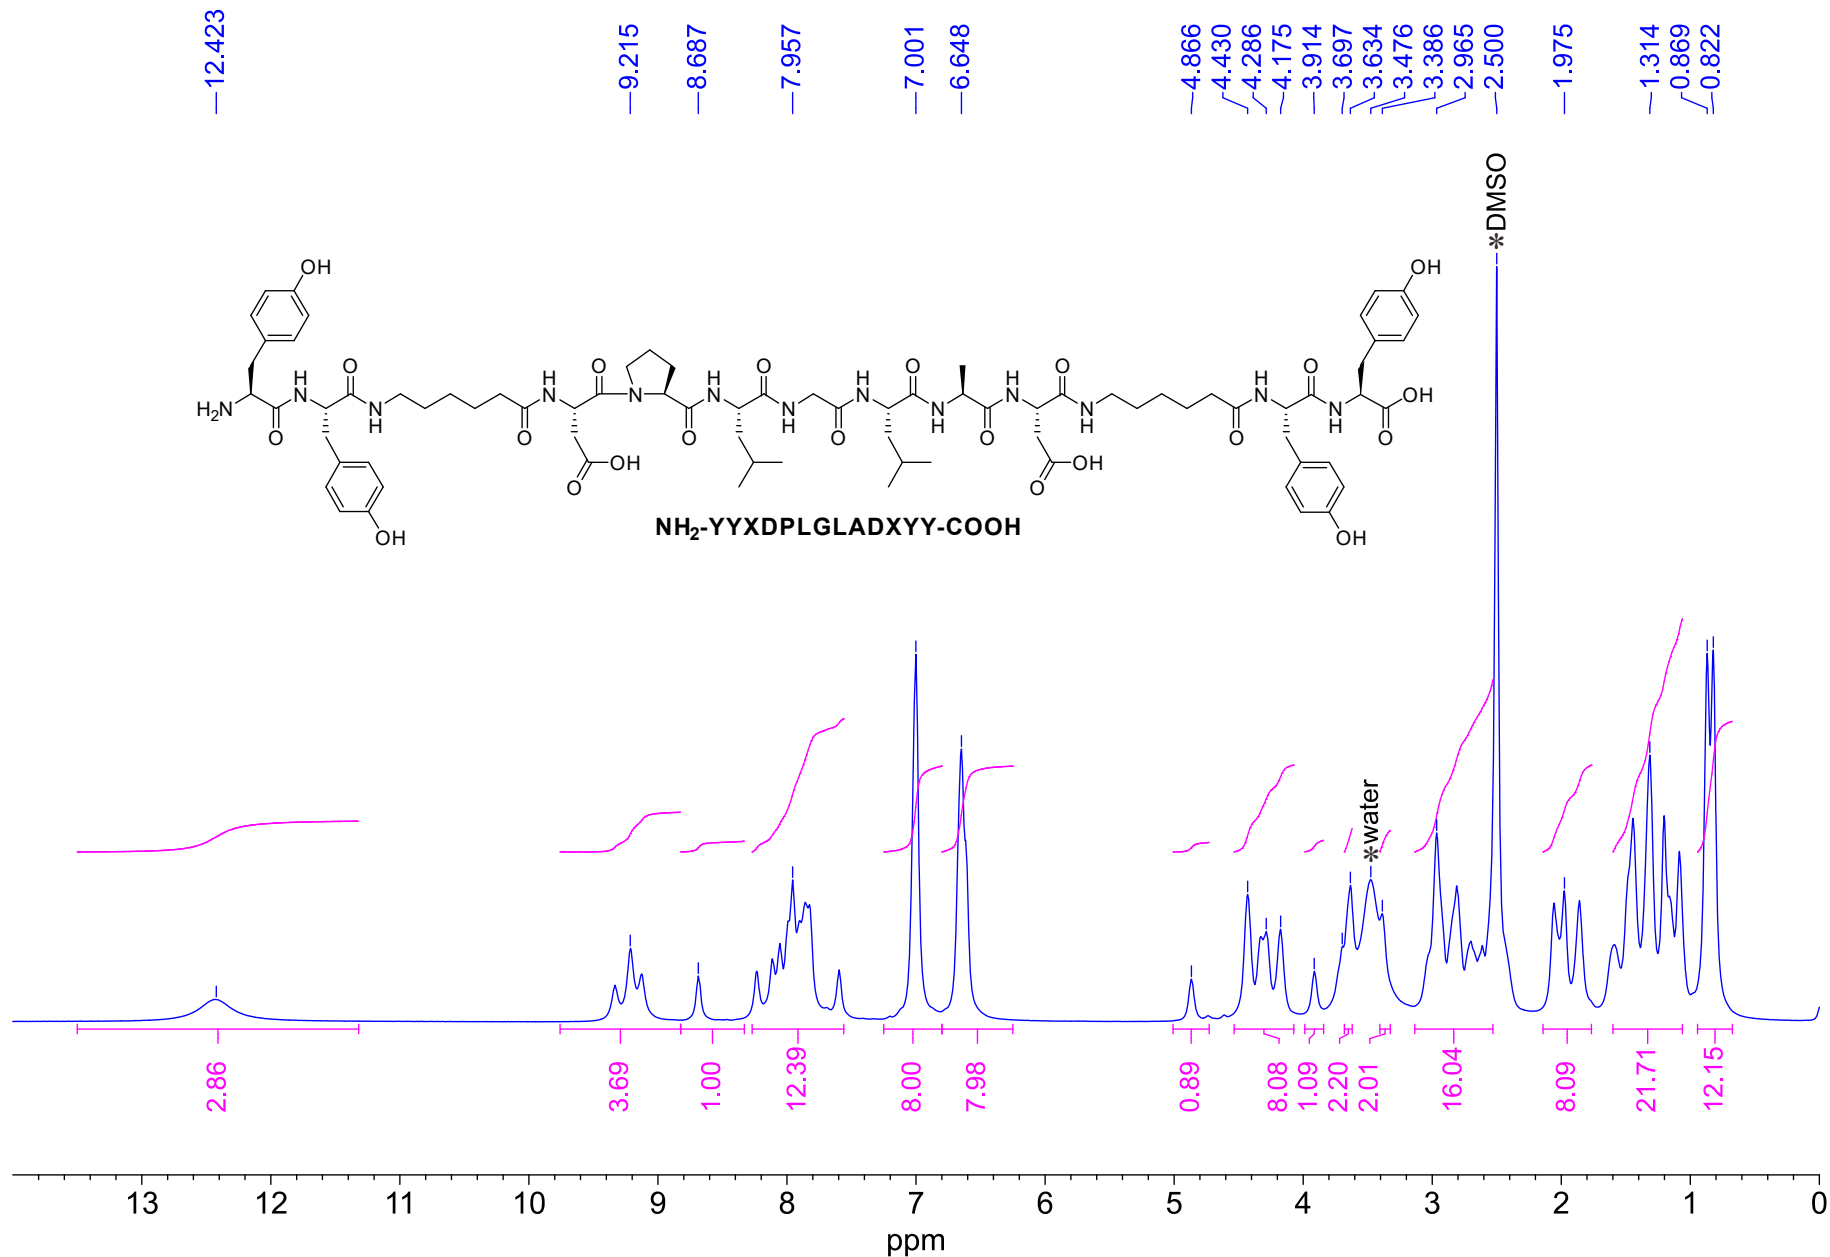

Fig. S26 <sup>1</sup>H NMR spectrum for YXD peptide in DMSO-d<sub>6</sub>.

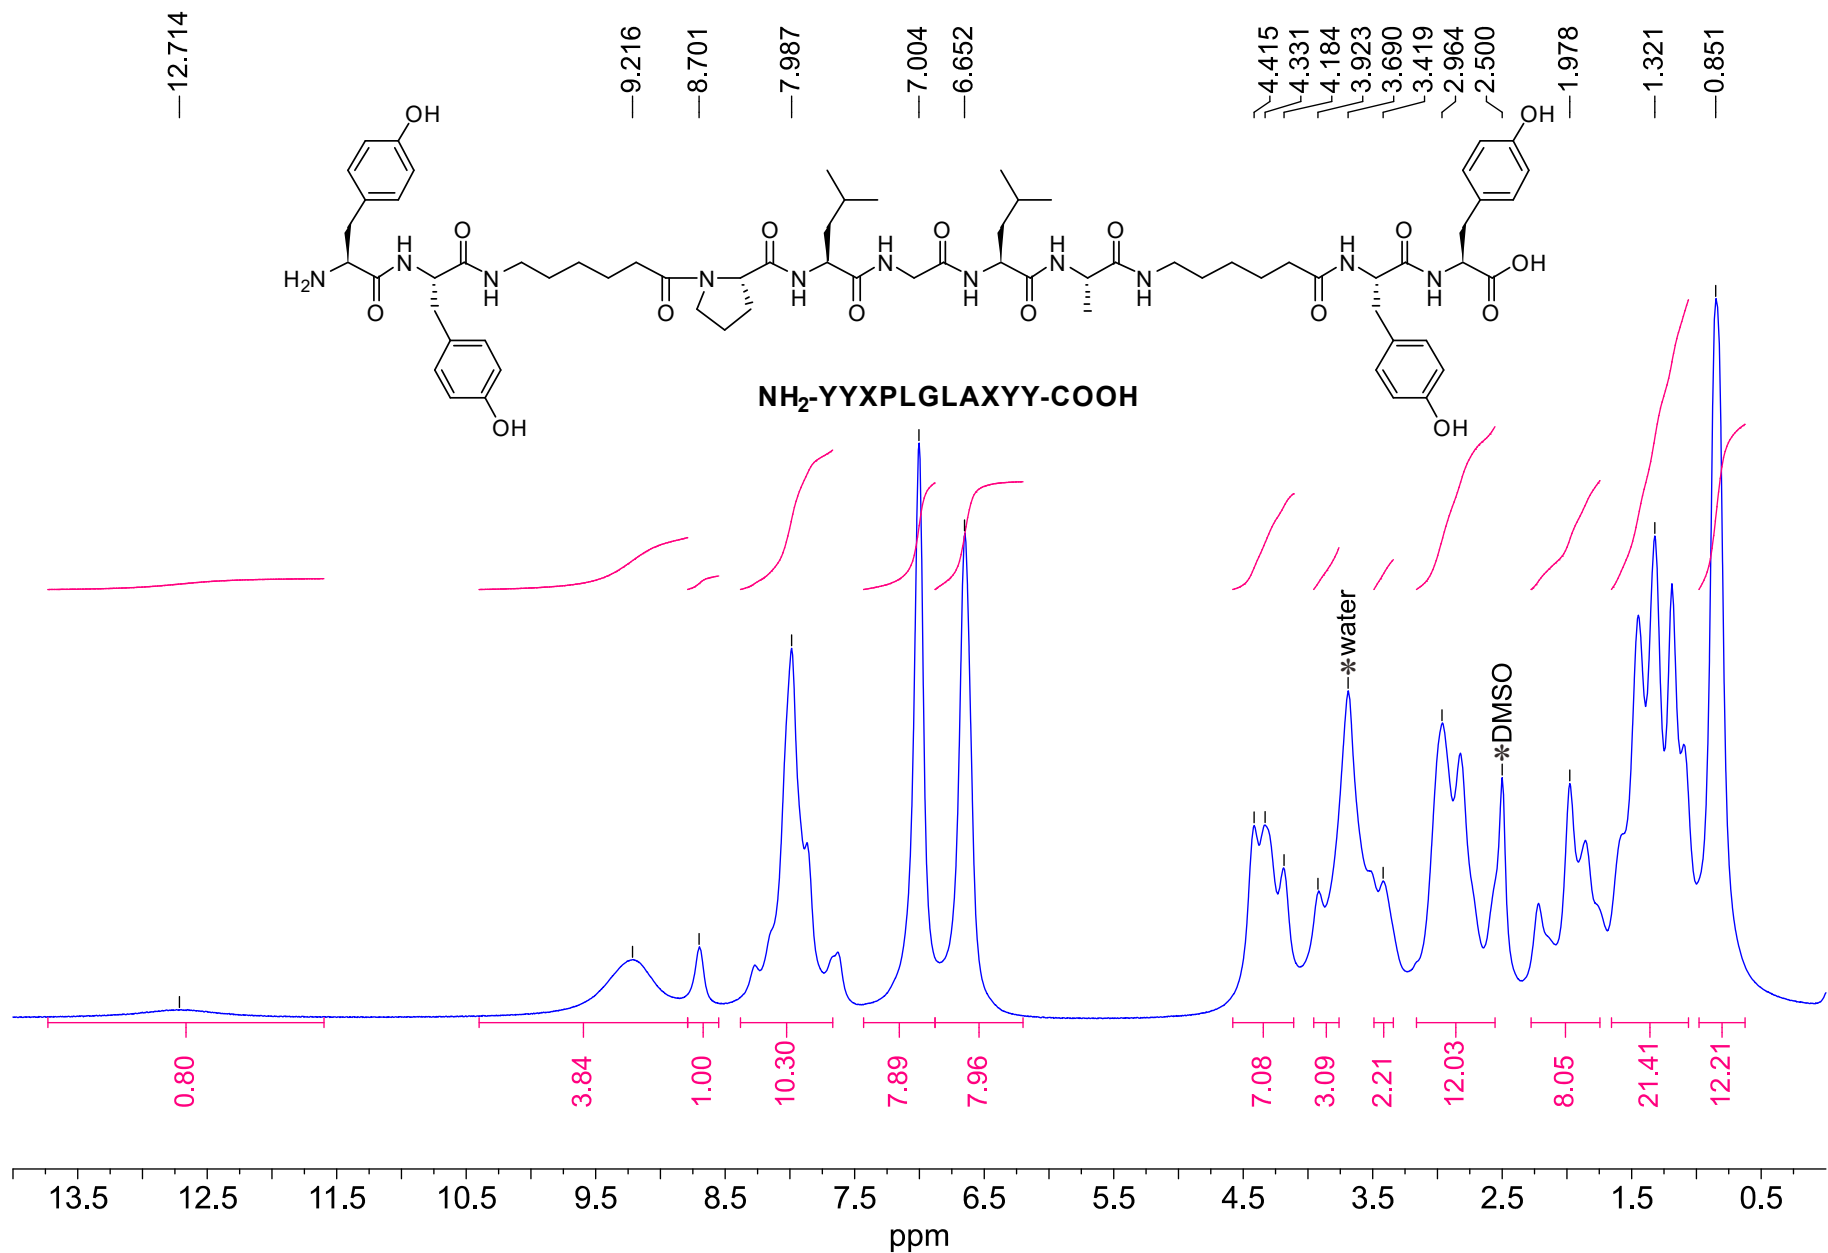

Fig. S27  $^1\text{H}$  NMR spectrum for YX peptide in  $\text{DMSO-}d_6$ .

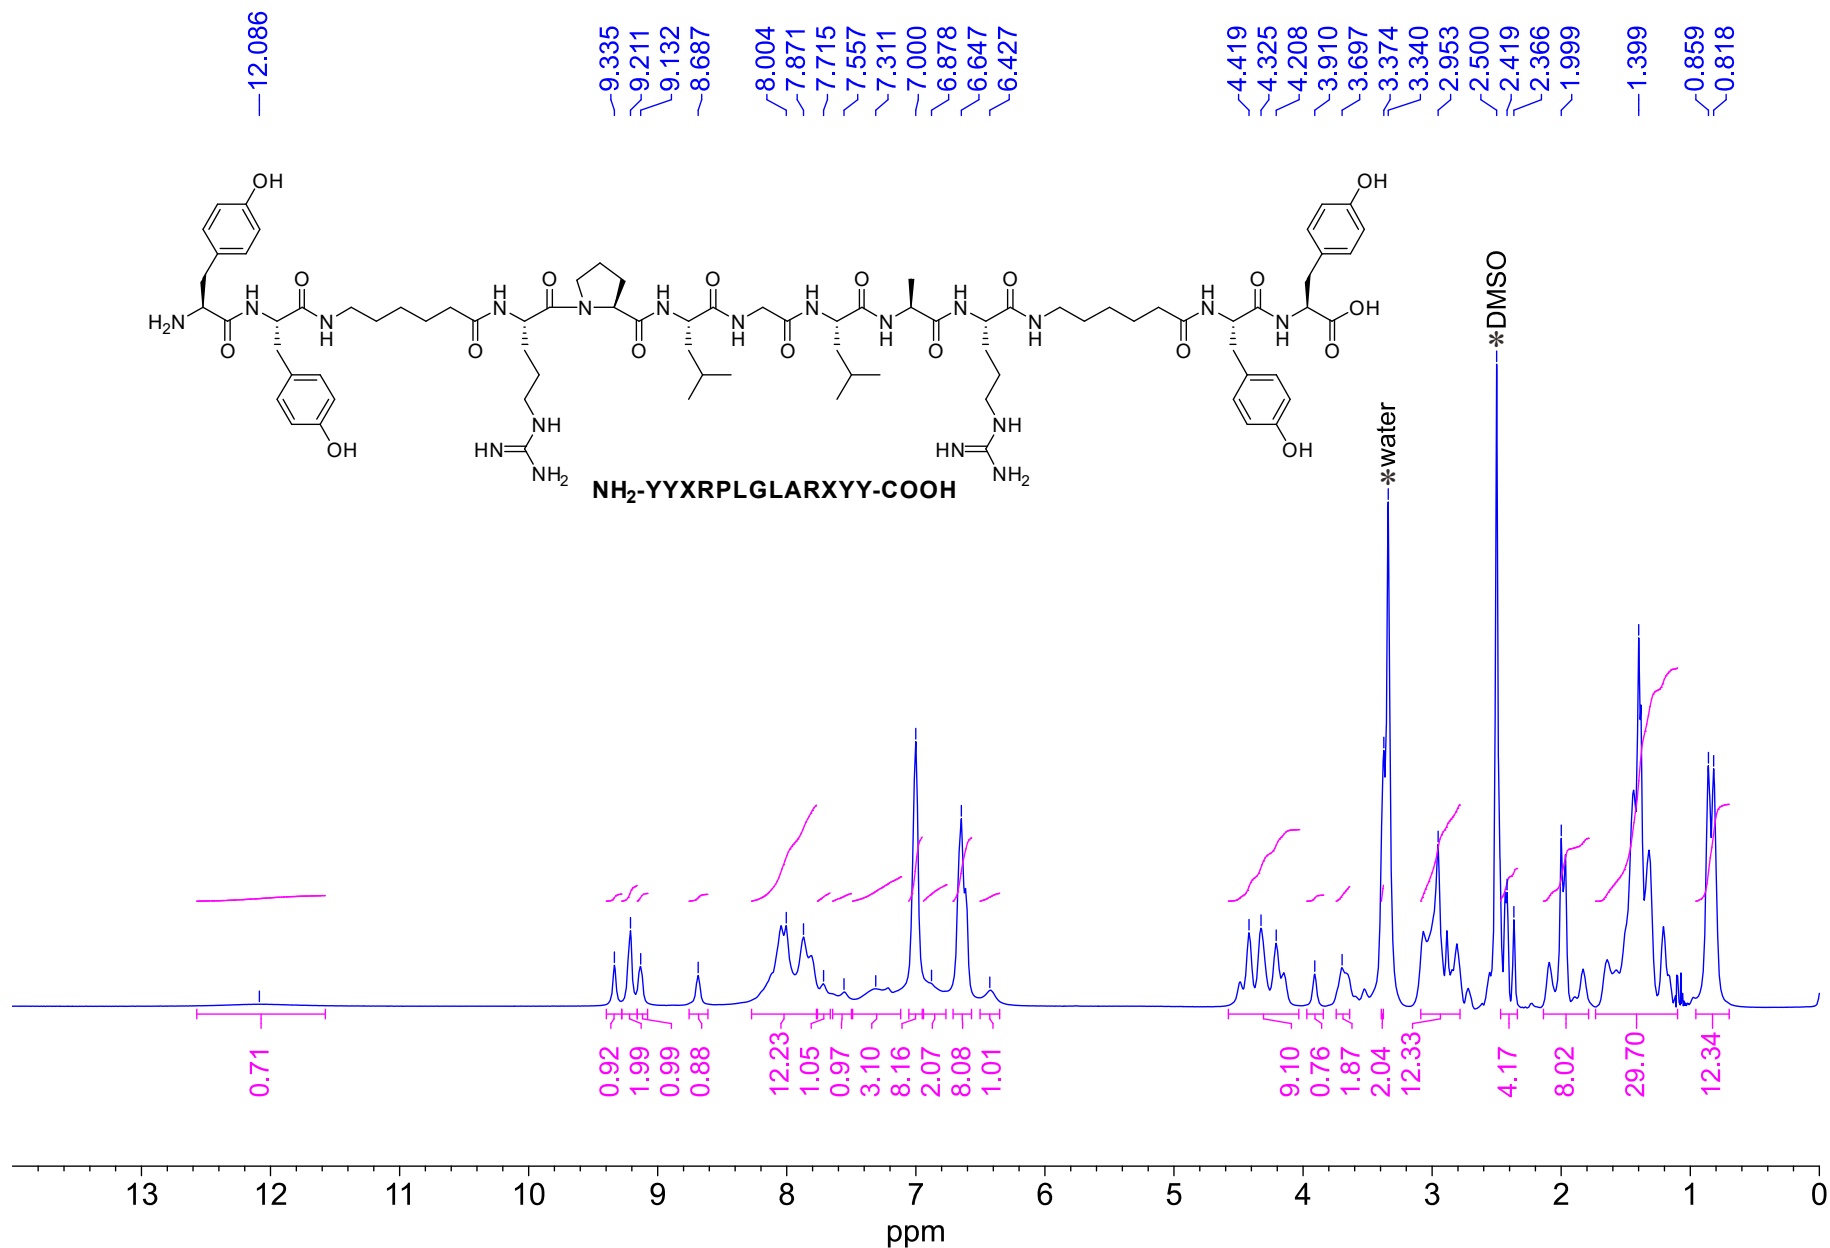

**Fig. S28** <sup>1</sup>H NMR spectrum for YXR peptide in DMSO-*d*<sub>6</sub>.

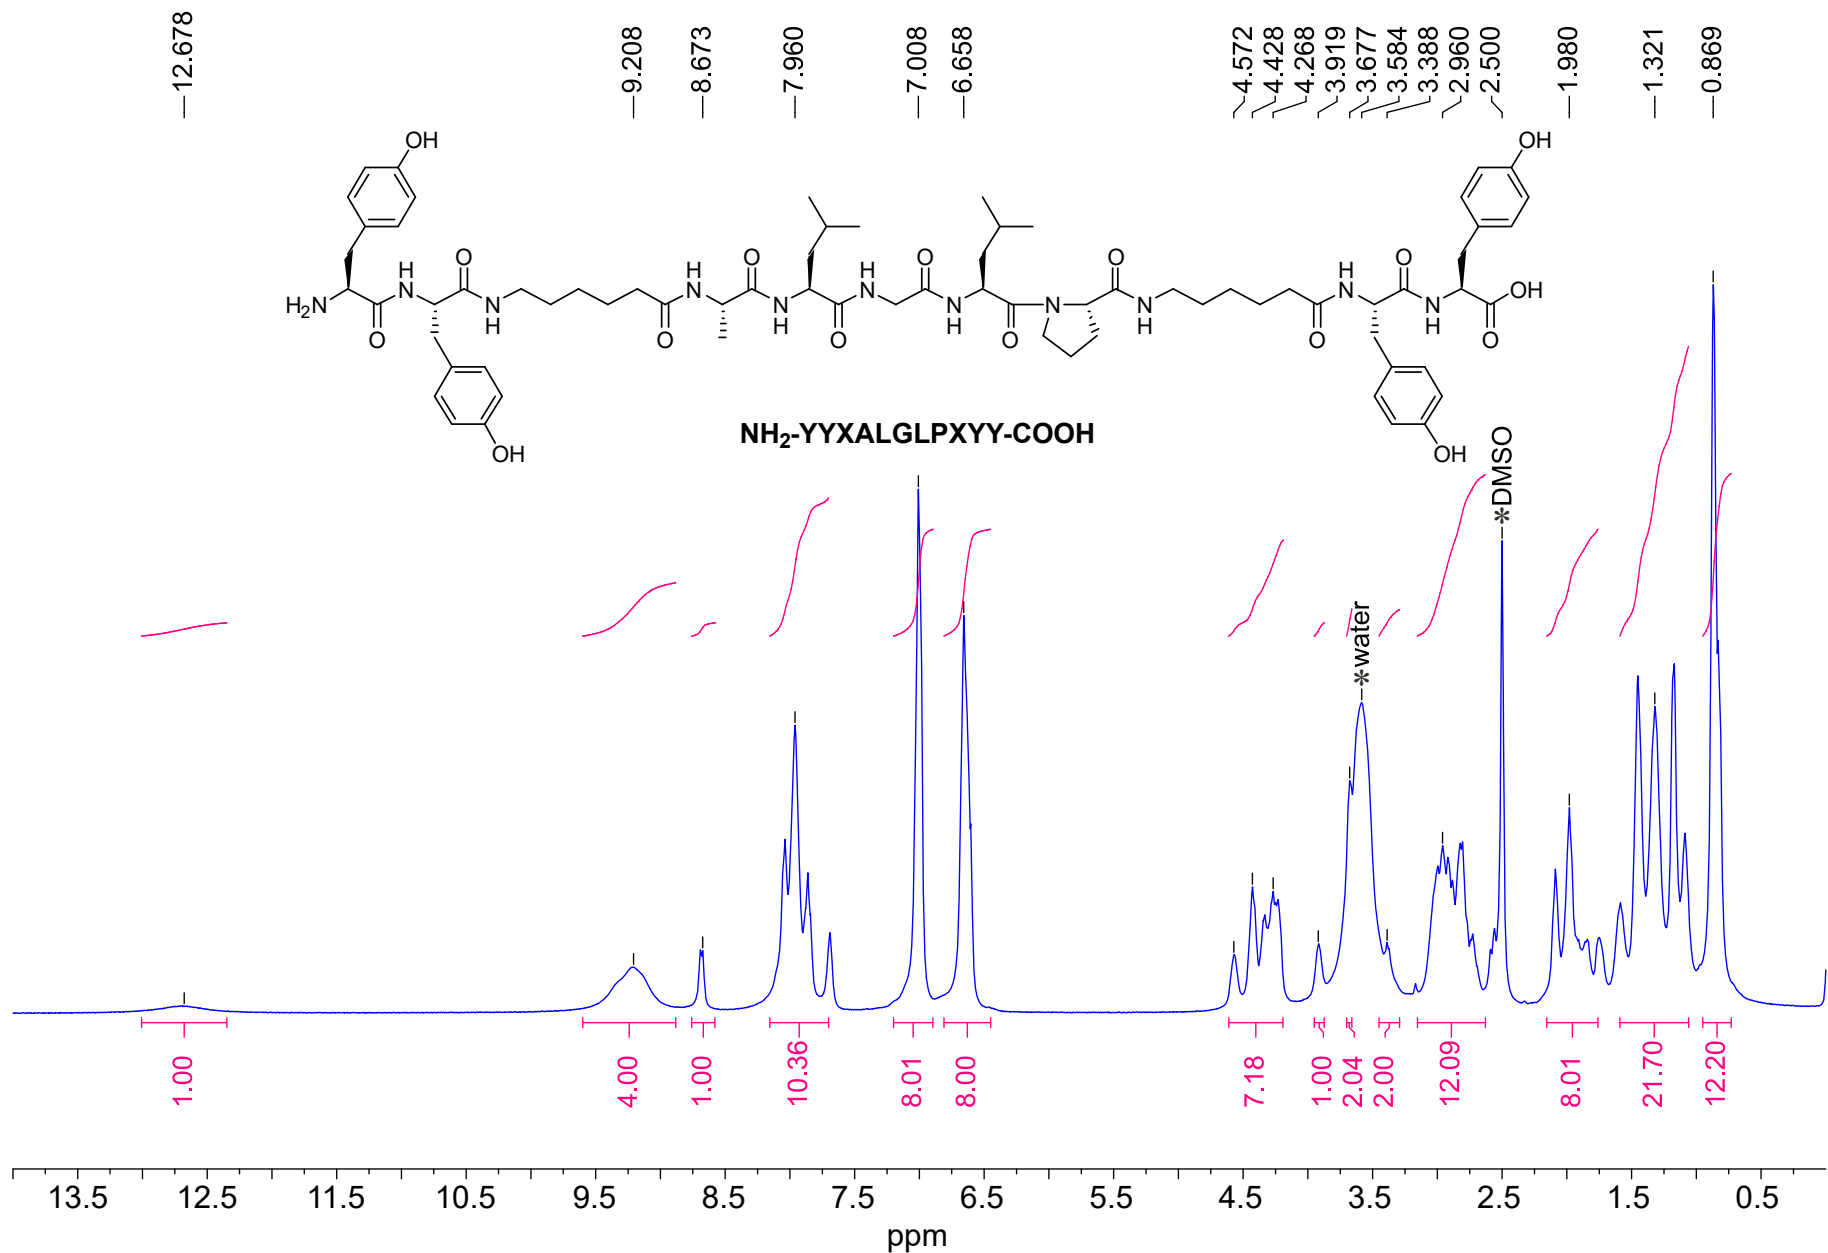

**Fig. S29** <sup>1</sup>H NMR spectrum for YYXALGLPXYY peptide in DMSO-*d*<sub>6</sub>.
